# Supplementary material
Source: PubMed Central journal article supplement (PMC7611559)
Supplement: EMS132834-supplement-Supplementary_Material.pdf [file EMS132834-supplement-Supplementary_Material.pdf]

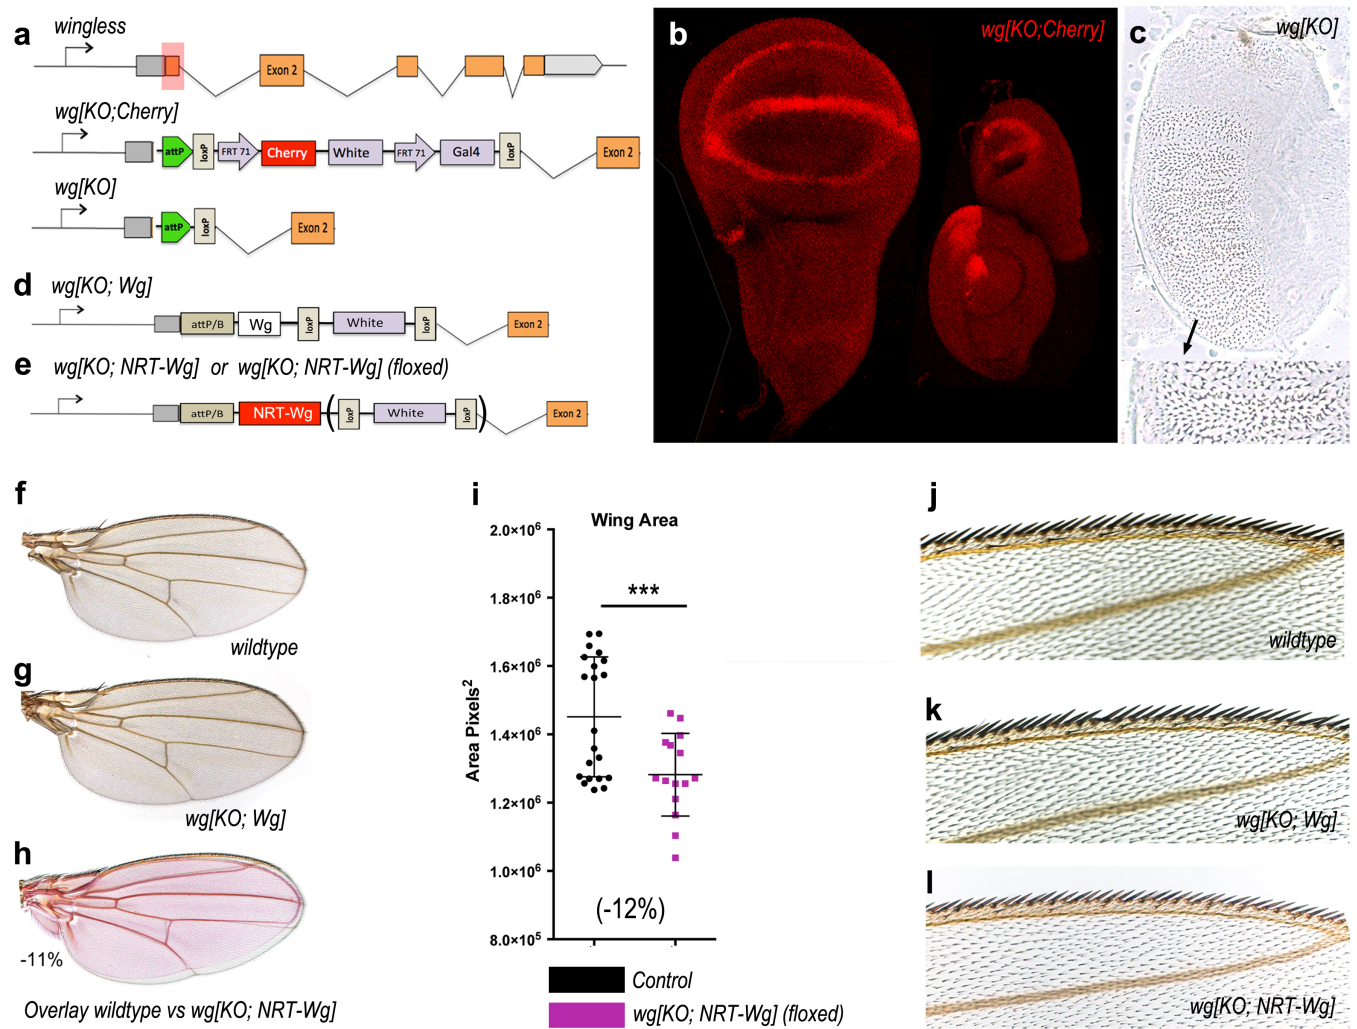

Supplementary Figure 1 Alexandre and Baena-Lopez

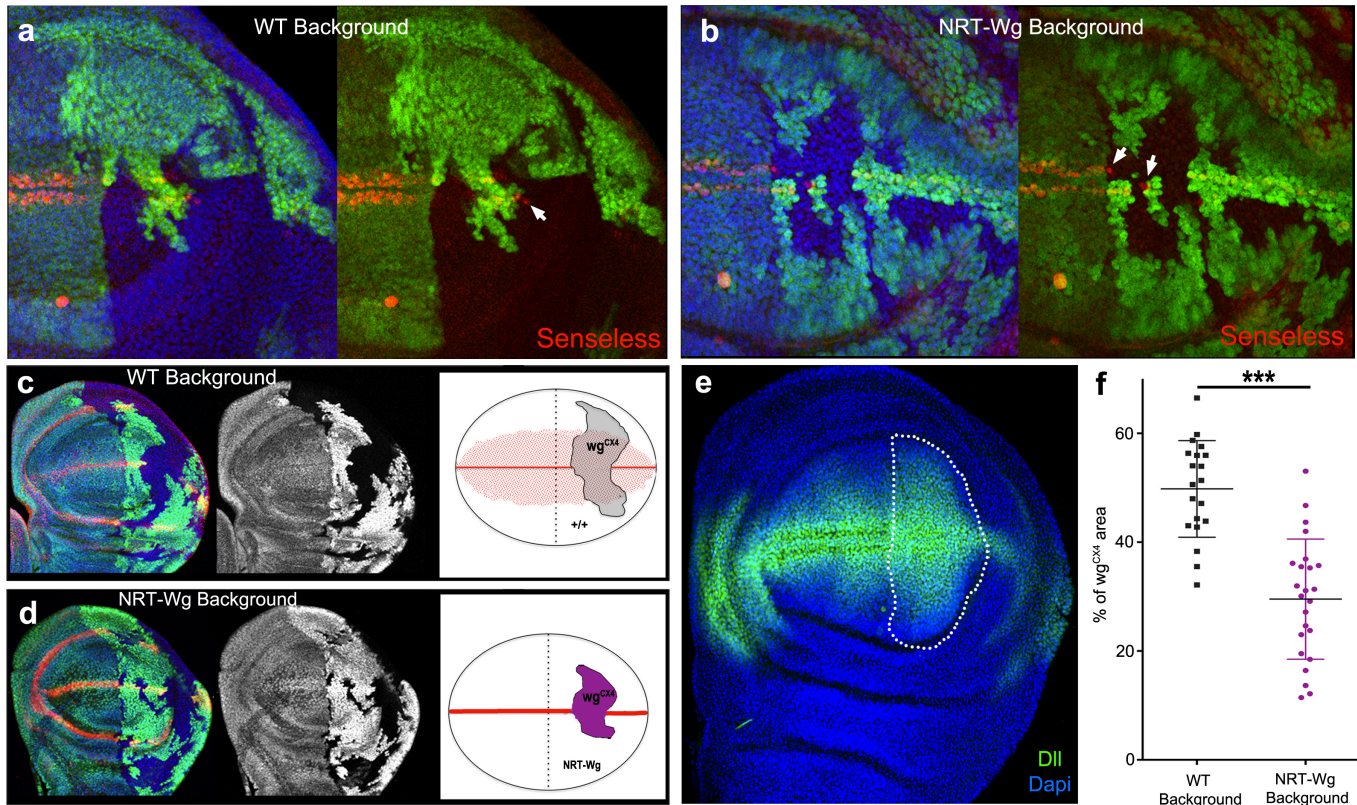

Supplementary Figure 2. Alexandre and Baena-Lopez

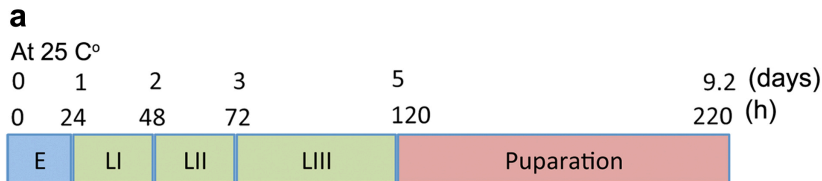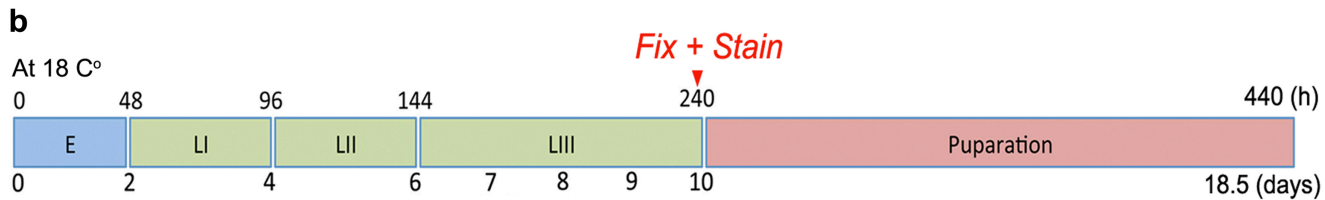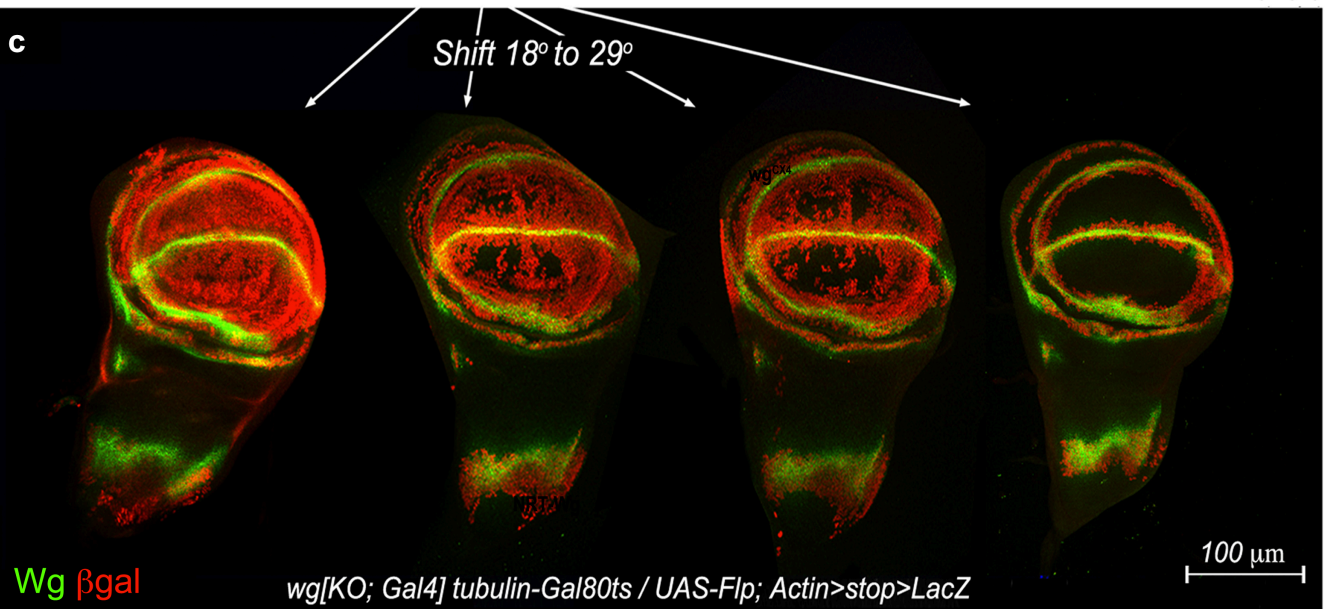

Supplementary Figure 3. Alexandre and Baena-Lopez



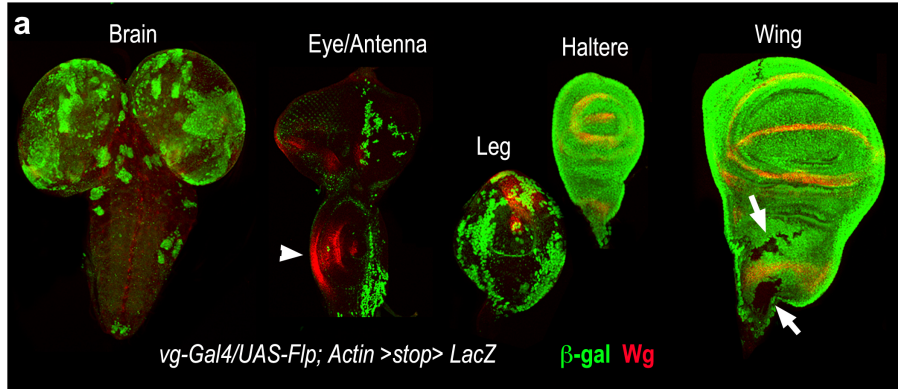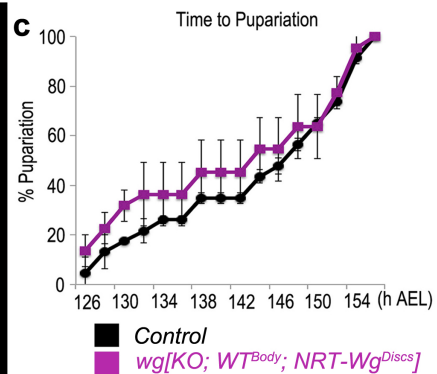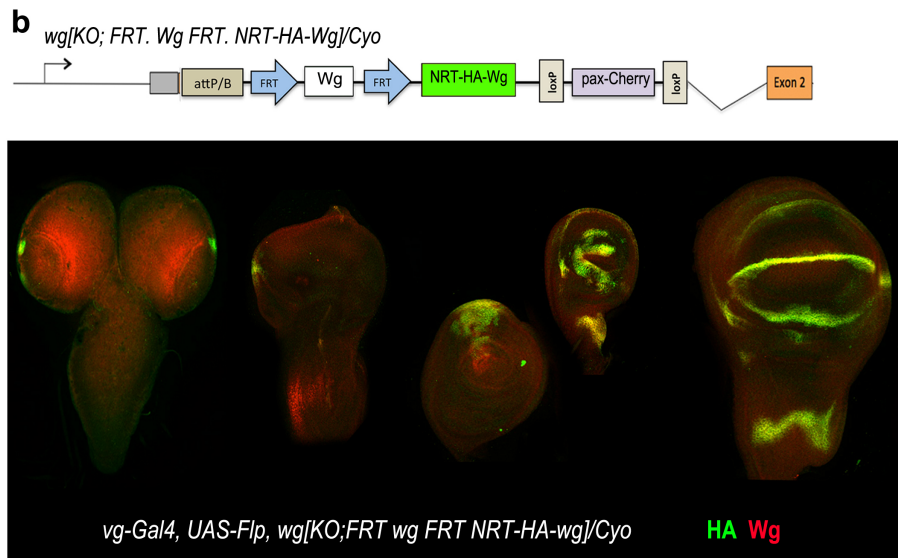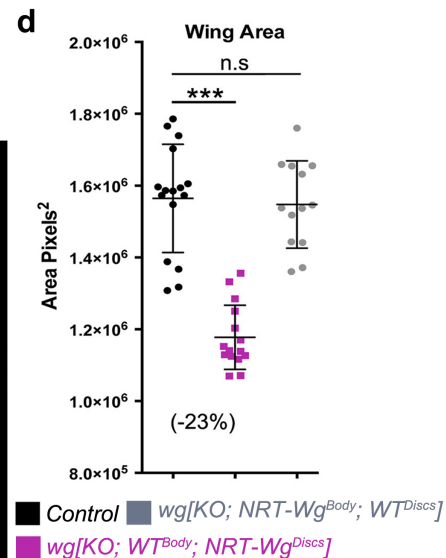

Supplementary Figure 4 Alexandre and Baena-Lopez
